# Supplementary material for: The effect of enhanced public–private partnerships on Maternal, Newborn and child Health Services and outcomes in Nairobi–Kenya: the PAMANECH quasi-experimental research protocol
Source: PubMed Central journal article supplement — BMJ Open. 2014 Oct 23;4(10):e006608. doi: 10.1136/bmjopen-2014-006608 (PMC4208053; doi:10.1136/bmjopen-2014-006608), 2014-10-23
Supplement: bmjopen-2014-006608.reviewer_comments.pdf [file bmjopen-2014-006608.reviewer_comments.pdf]

## PEER REVIEW HISTORY

BMJ Open publishes all reviews undertaken for accepted manuscripts. Reviewers are asked to complete a checklist review form (<http://bmjopen.bmj.com/site/about/resources/checklist.pdf>) and are provided with free text boxes to elaborate on their assessment. These free text comments are reproduced below.

## ARTICLE DETAILS

|                            |                                                                                                                                 |
|----------------------------|---------------------------------------------------------------------------------------------------------------------------------|
| <b>TITLE (PROVISIONAL)</b> | Exploring cardiovascular health in Suriname (the HELISUR study): protocol for a cross-sectional population-based study          |
| <b>AUTHORS</b>             | Diemer, Frederieke; Oehlers, Glenn; Aartman, Jet; Baldew, Se-Sergio; Jarbandhan, Ameerani; van Montfrans, Gert; Brewster, Lizzy |

This article was not externally reviewed at BMJ Open. Protocols that have been independently assessed prior to submission to BMJ Open are usually fast-tracked to publication on the grounds that further substantial changes will not be possible. This independent assessment will usually be external, independent review for both a substantial grant award from a non-commercial or government funder and ethics approval.
